# Supplementary material for: Syntheses, structures and properties of a series of organic–inorganic complexes based on methylenediisophthalic acid (H4MDIP)
Source: Royal Society of Chemistry journal article supplement (doi:10.1039/b709972j), 2007-10-15
Supplement: b709972j.pdf [file b709972j.pdf]

## Supporting Information

Table S1 Hydrogen bond distances [Å] and angles [°].  
 (D, donor atom; A, acceptor atom).

| D-H                    | d(D-H) | d(H...A) | <DHA   | d(D...A) | A                  |
|------------------------|--------|----------|--------|----------|--------------------|
| <b>1<sup>I</sup></b>   |        |          |        |          |                    |
| O1-H1                  | 0.820  | 1.677    | 160.79 | 2.466    | O3 <sup>a</sup>    |
| O5-H5                  | 0.820  | 1.763    | 149.99 | 2.506    | O8 <sup>b</sup>    |
| O9-H9B                 | 0.850  | 1.956    | 164.61 | 2.785    | O6 <sup>c</sup>    |
| O9-H9C                 | 0.850  | 1.923    | 153.84 | 2.712    | O13 <sup>d</sup>   |
| O10-H10A               | 0.850  | 2.096    | 147.31 | 2.848    | O15 <sup>e</sup>   |
| O10-H10B               | 0.850  | 2.121    | 133.97 | 2.780    | O13 <sup>f</sup>   |
| O11-H11A               | 0.850  | 2.060    | 156.26 | 2.859    | O6 <sup>g</sup>    |
| O11-H11B               | 0.850  | 1.862    | 154.24 | 2.653    | O7 <sup>h</sup>    |
| O12-H12A               | 0.850  | 2.191    | 138.19 | 2.881    | O15 <sup>i</sup>   |
| O12-H12B               | 0.850  | 2.093    | 145.35 | 2.834    | O9 <sup>j</sup>    |
| O13-H13A               | 0.850  | 1.915    | 160.82 | 2.732    | O8 <sup>g</sup>    |
| O13-H13C               | 0.850  | 1.965    | 158.03 | 2.772    | O14 <sup>j</sup>   |
| O14-H14A               | 0.850  | 1.889    | 160.06 | 2.703    | O7                 |
| O14-H14C               | 0.850  | 2.357    | 145.03 | 3.092    | O1                 |
| O15-H15A               | 0.850  | 2.057    | 158.66 | 2.865    | O3 <sup>g</sup>    |
| O15-H15C               | 0.850  | 2.028    | 155.89 | 2.825    | O14 <sup>k</sup>   |
| <b>2<sup>II</sup></b>  |        |          |        |          |                    |
| O(9)-H(9A)             | 0.85   | 2.28     | 150.6  | 3.047(4) | O(17) <sup>a</sup> |
| O(12)-H(12C)           | 0.85   | 1.99     | 156.8  | 2.791(4) | O(13) <sup>b</sup> |
| O(12)-H(12B)           | 0.85   | 2.11     | 147.6  | 2.862(4) | O(16)              |
| O(13)-H(13D)           | 0.85   | 1.97     | 139.8  | 2.680(4) | O(4)               |
| O(13)-H(13B)           | 0.85   | 1.99     | 144.4  | 2.727(4) | O(14) <sup>c</sup> |
| O(14)-H(14A)           | 0.85   | 1.83     | 173.2  | 2.672(4) | O(5) <sup>d</sup>  |
| O(15)-H(15A)           | 0.85   | 1.90     | 175.9  | 2.747(4) | O(8) <sup>e</sup>  |
| O(16)-H(16C)           | 0.85   | 1.77     | 164.3  | 2.603(5) | O(16) <sup>f</sup> |
| O(17)-H(17B)           | 0.85   | 2.24     | 144.8  | 2.972(4) | O(15) <sup>g</sup> |
| <b>3<sup>III</sup></b> |        |          |        |          |                    |
| O(9)-H(9B)             | 0.85   | 2.04     | 153.7  | 2.830(5) | O(16)              |
| O(10)-H(10A)           | 0.85   | 2.03     | 165.2  | 2.861(5) | O(16)              |
| O(14)-H(14A)           | 0.85   | 2.07     | 147.9  | 2.824(5) | O(4)               |
| O(9)-H(9A)             | 0.85   | 1.95     | 166.1  | 2.781(5) | O(7) <sup>a</sup>  |
| O(10)-H(10B)           | 0.85   | 1.95     | 158.8  | 2.761(5) | O(12) <sup>b</sup> |
| O(11)-H(11A)           | 0.85   | 1.96     | 140.7  | 2.676(5) | O(6) <sup>c</sup>  |
| O(11)-H(11B)           | 0.85   | 2.55     | 161.7  | 3.365(5) | O(17) <sup>d</sup> |
| O(12)-H(12A)           | 0.85   | 1.88     | 170.0  | 2.721(5) | O(3) <sup>e</sup>  |
| O(16)-H(16A)           | 0.85   | 2.39     | 132.2  | 3.031(5) | O(13) <sup>e</sup> |
| O(16)-H(16C)           | 0.85   | 2.42     | 136.4  | 3.095(5) | O(14) <sup>e</sup> |
| O(12)-H(12B)           | 0.85   | 1.91     | 150.5  | 2.687(5) | O(1)d              |

|                       |       |       |        |          |                    |
|-----------------------|-------|-------|--------|----------|--------------------|
| O(13)-H(13B)          | 0.85  | 2.39  | 168.8  | 3.230(5) | O(17) <sup>f</sup> |
| O(15)-H(15A)          | 0.85  | 1.96  | 162.3  | 2.783(5) | O(17) <sup>f</sup> |
| O(13)-H(13A)          | 0.82  | 2.04  | 163.9  | 2.841(5) | O(9) <sup>g</sup>  |
| O(14)-H(14B)          | 0.85  | 2.24  | 140.9  | 2.946(5) | O(4) <sup>h</sup>  |
| O(15)-H(15B)          | 0.85  | 2.18  | 155.7  | 2.979(5) | O(3) <sup>h</sup>  |
| O(17)-H(17A)          | 0.85  | 2.00  | 171.8  | 2.843(4) | O(8) <sup>i</sup>  |
| O(17)-H(17B)          | 0.85  | 2.28  | 136.9  | 2.961(5) | O(10) <sup>j</sup> |
| <b>4<sup>IV</sup></b> |       |       |        |          |                    |
| O(8)-H(8E)            | 0.85  | 1.85  | 132.6  | 2.500(8) | O(10)              |
| O(5)-H(5A)            | 0.85  | 2.45  | 129.0  | 3.054(6) | O(9) <sup>a</sup>  |
| O(5)-H(5B)            | 0.85  | 2.07  | 168.7  | 2.904(7) | O(6) <sup>b</sup>  |
| O(6)-H(6A)            | 0.96  | 1.74  | 168.5  | 2.691(6) | O(2) <sup>c</sup>  |
| O(6)-H(6B)            | 0.96  | 1.97  | 134.7  | 2.730(6) | O(4) <sup>d</sup>  |
| O(8)-H(8C)            | 0.96  | 2.00  | 150.3  | 2.877(6) | O(4) <sup>d</sup>  |
| O(7)-H(7B)            | 0.85  | 1.94  | 162.2  | 2.759(6) | O(1) <sup>e</sup>  |
| O(7)-H(7C)            | 0.85  | 2.01  | 154.0  | 2.799(7) | O(5) <sup>f</sup>  |
| <b>5<sup>V</sup></b>  |       |       |        |          |                    |
| O(6)-H(6A)            | 0.91  | 1.75  | 164.0  | 2.635(3) | O(5) <sup>a</sup>  |
| O(8)-H(8)             | 0.89  | 1.76  | 167.0  | 2.635(3) | O(1) <sup>b</sup>  |
| O(9)-H(9B)            | 0.85  | 2.14  | 146.9  | 2.887(4) | O(1) <sup>c</sup>  |
| O(9)-H(9C)            | 0.85  | 2.03  | 157.9  | 2.839(4) | O(4) <sup>d</sup>  |
| O(10)-H(10C)          | 0.85  | 2.35  | 142.4  | 3.069(2) | O(8)               |
| O(10)-H(10D)          | 0.85  | 2.52  | 123.4  | 3.069(2) | O(8) <sup>b</sup>  |
| <b>6<sup>VI</sup></b> |       |       |        |          |                    |
| O2-H2A                | 0.820 | 1.815 | 170.13 | 2.627    | O5 <sup>a</sup>    |
| O3-H3                 | 0.820 | 1.806 | 177.63 | 2.626    | O4 <sup>b</sup>    |
| O9-H9A                | 0.850 | 2.355 | 125.74 | 2.934    | O5 <sup>c</sup>    |
| O9-H9B                | 0.850 | 2.021 | 169.39 | 2.860    | O8 <sup>d</sup>    |
| O10-H10C              | 0.850 | 2.459 | 128.86 | 3.065    | O2                 |
| O10-H10B              | 0.850 | 2.432 | 131.85 | 3.065    | O2 <sup>a</sup>    |

<sup>I</sup> Symmetry codes: <sup>a</sup> -x+2, y-1/2, -z+3/2; <sup>b</sup> -x+2, y+1/2, -z+1/2; <sup>c</sup> x+1/2, -y+1/2, -z+1; <sup>d</sup> x+1, y, z; <sup>e</sup> x+1, y, z+1; <sup>f</sup> x+1/2, -y+1/2, -z+2; <sup>g</sup> x-1/2, -y+1/2, -z+1; <sup>h</sup> -x+3/2, -y, z+1/2; <sup>i</sup> x-1/2, -y+1/2, -z+2; <sup>j</sup> -x+1, y+1/2, -z+3/2; <sup>k</sup> -x+3/2, -y, z-1/2.

<sup>II</sup> Symmetry codes: <sup>a</sup> x, y-1, z-1; <sup>b</sup> x-1/2, y-1/2, z; <sup>c</sup> x, y, z-1; <sup>d</sup> x, y, z+1; <sup>e</sup> x, y+1, z; <sup>f</sup> -x, y, -z+1/2; <sup>g</sup> -x+1/2, -y+3/2, -z+1.

<sup>III</sup> Symmetry codes: <sup>a</sup> x-1, -y+1/2, z-1/2; <sup>b</sup> -x, y+1/2, -z+1/2; <sup>c</sup> -x, -y+1, -z+1; <sup>d</sup> -x, y-1/2, -z+1/2; <sup>e</sup> -y+1/2, z-1/2; <sup>f</sup> x-1, y-1, z; <sup>g</sup> -x-1, y-1/2, -z+1/2; <sup>h</sup> -x, -y, -z+1; <sup>i</sup> -x+1, y+1/2, -z+1/2; <sup>j</sup> x+1, y, z.

<sup>IV</sup> Symmetry codes: <sup>a</sup> x-1, y-1, z; <sup>b</sup> -y, z-1/2; <sup>c</sup> -x+1/2, -y+1/2, -z+1; <sup>d</sup> x+1/2, y-1/2, z+1; <sup>e</sup> -x, y, -z+1/2; <sup>f</sup> x, -y, z+1/2.

<sup>V</sup> Symmetry codes: <sup>a</sup> -x+2, -y+2, -z; <sup>b</sup> -x, -y+1, -z; <sup>c</sup> x, y+1, z-1; <sup>d</sup> x, y, z-1.

<sup>VI</sup> Symmetry codes: <sup>a</sup> -x+1, -y+1, -z; <sup>b</sup> -x+3, -y+2, -z; <sup>c</sup> -x+1, -y, -z+1; <sup>d</sup> -x+1, -y+1, -z+1.

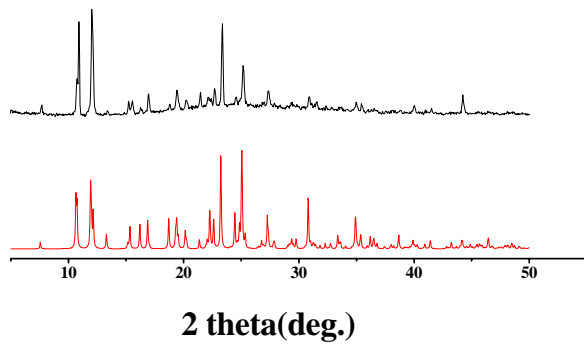

(a)

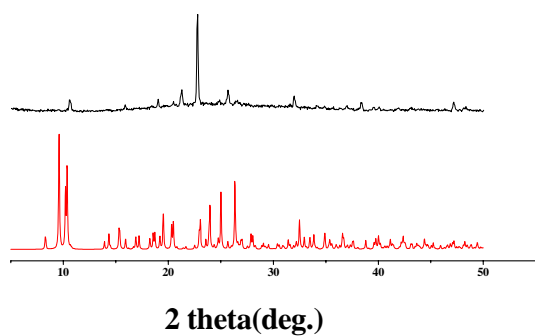

(b)

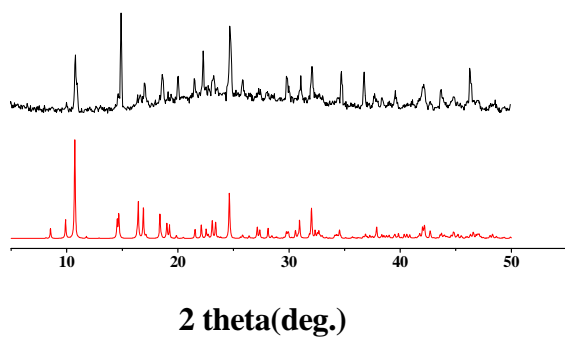

(c)

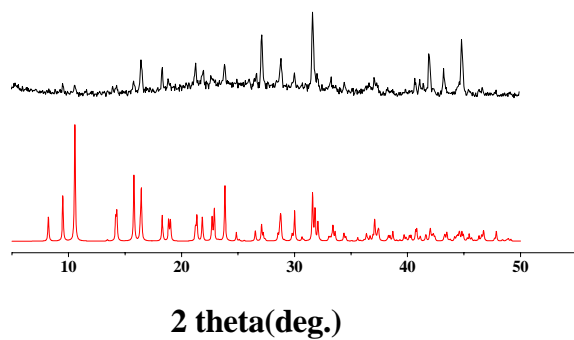

(d)

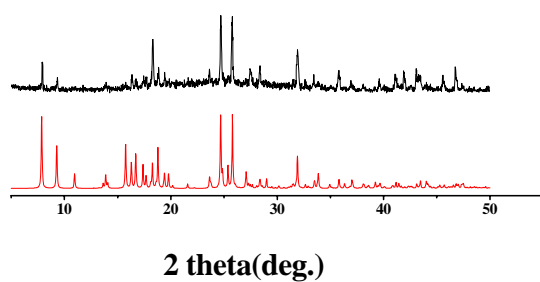

(e)

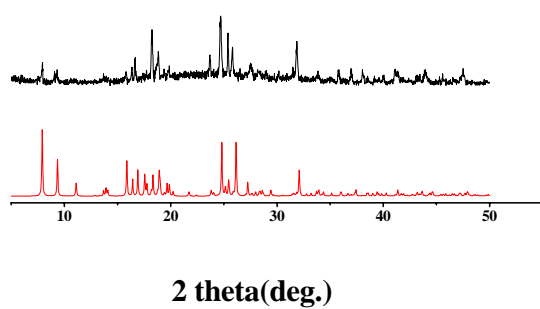

(f)

Figure S1 X-ray powder diffraction diagram of complexes **1-6** (a-f). Red: simulated figure; black: experimental data.

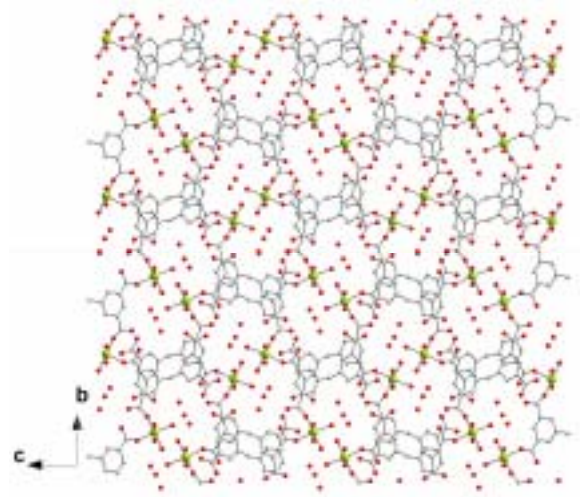

Figure S2 The adjacent layers stacking along *bc* plane of complex **1**.

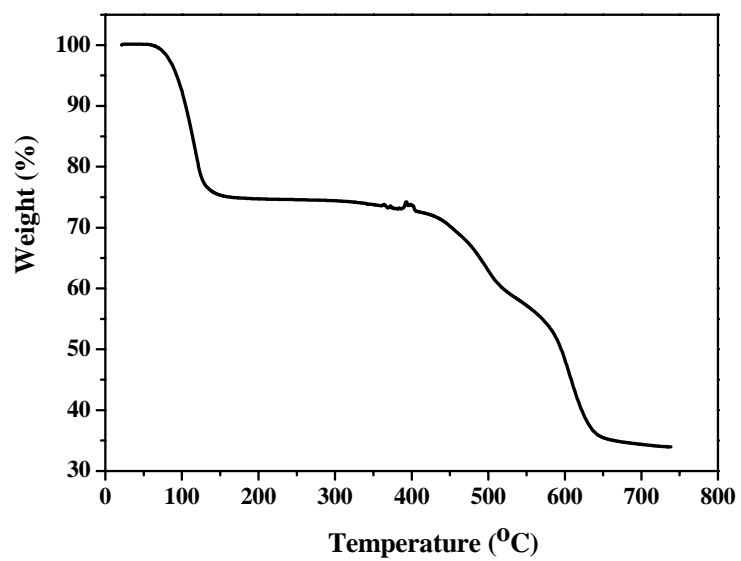

(a)

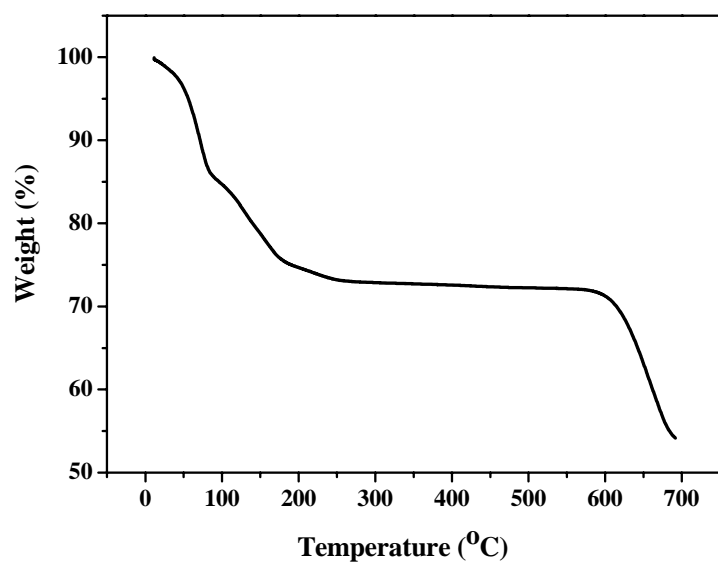

(b)

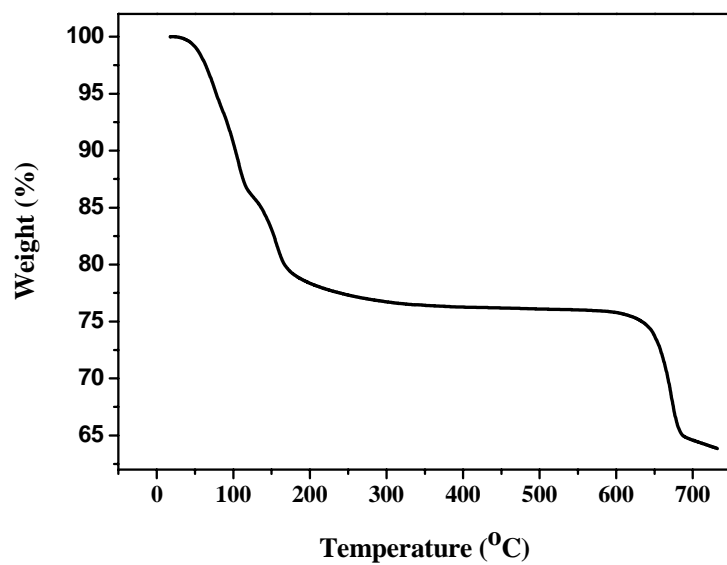

(c)

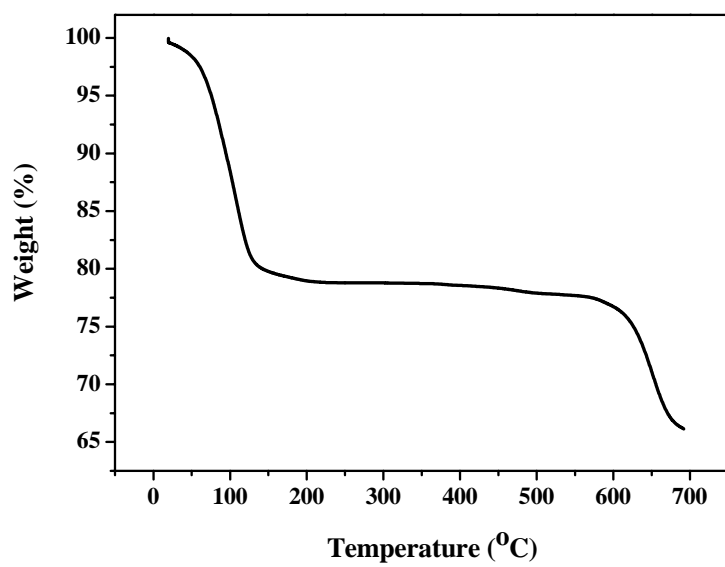

(d)

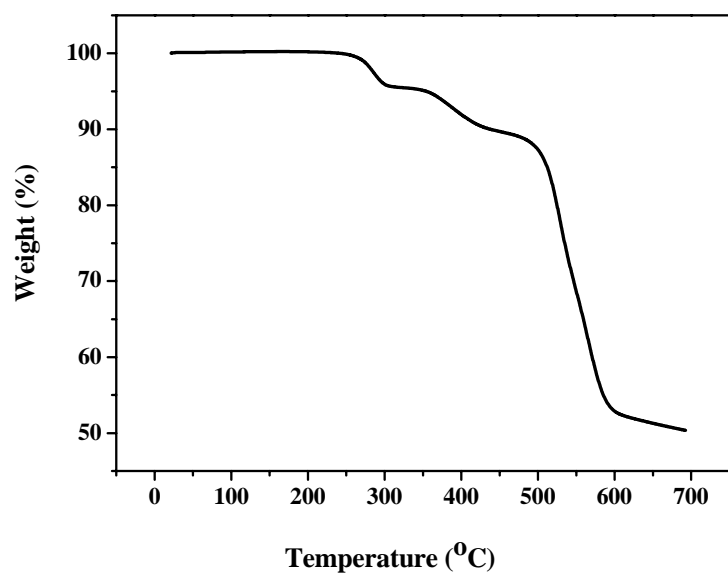

(e)

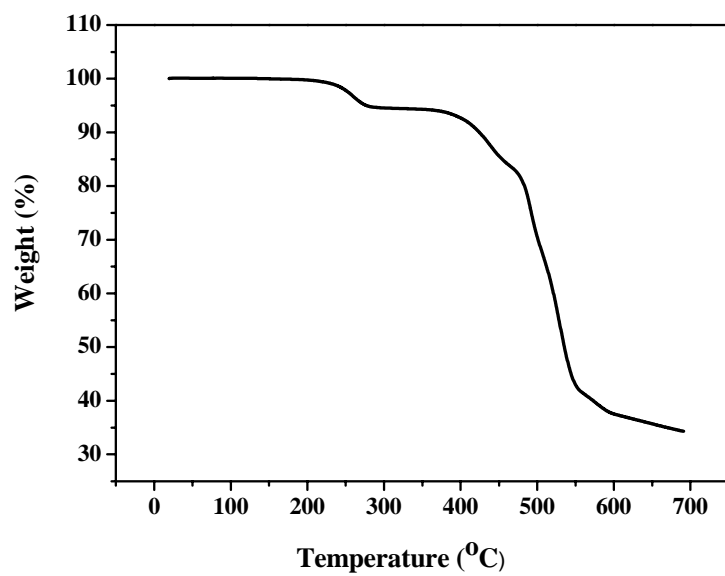

(f)

Figure S3 The TG curves of complexes **1-6** (a-f).
